# Supplementary material for: Peripheral (not central) corneal epithelia contribute to the closure of an annular debridement injury
Source: PubMed Central journal article supplement — Proc Natl Acad Sci U S A. 2019 Dec 16;116(52):26633–43. doi: 10.1073/pnas.1912260116 (PMC6936562; doi:10.1073/pnas.1912260116), 2019-12-16
Supplement: pnas.1912260116.sapp.pdf [file pnas.1912260116.sapp.pdf]

Supplementary Information for

**Peripheral (not central) corneal epithelia contribute to the closure of an annular  
debridement injury**

Mijeong Park, Alexander Richardson, Elvis Pandzic, Erwin P. Lobo, J. Guy Lyons, and  
Nick Di Girolamo

Nick Di Girolamo

Email: [n.digirolamo@unsw.edu.au](mailto:n.digirolamo@unsw.edu.au)

**This PDF file includes:**

SI Appendix Fig. S1 and Figure legend

Materials and Methods for SI Appendix Fig. S1

Titles for SI Appendix Movies S1 to S3

**Other supplementary materials for this manuscript include the following:**

SI Appendix, Fig. S1

SI Appendix, Movies S1 to S3

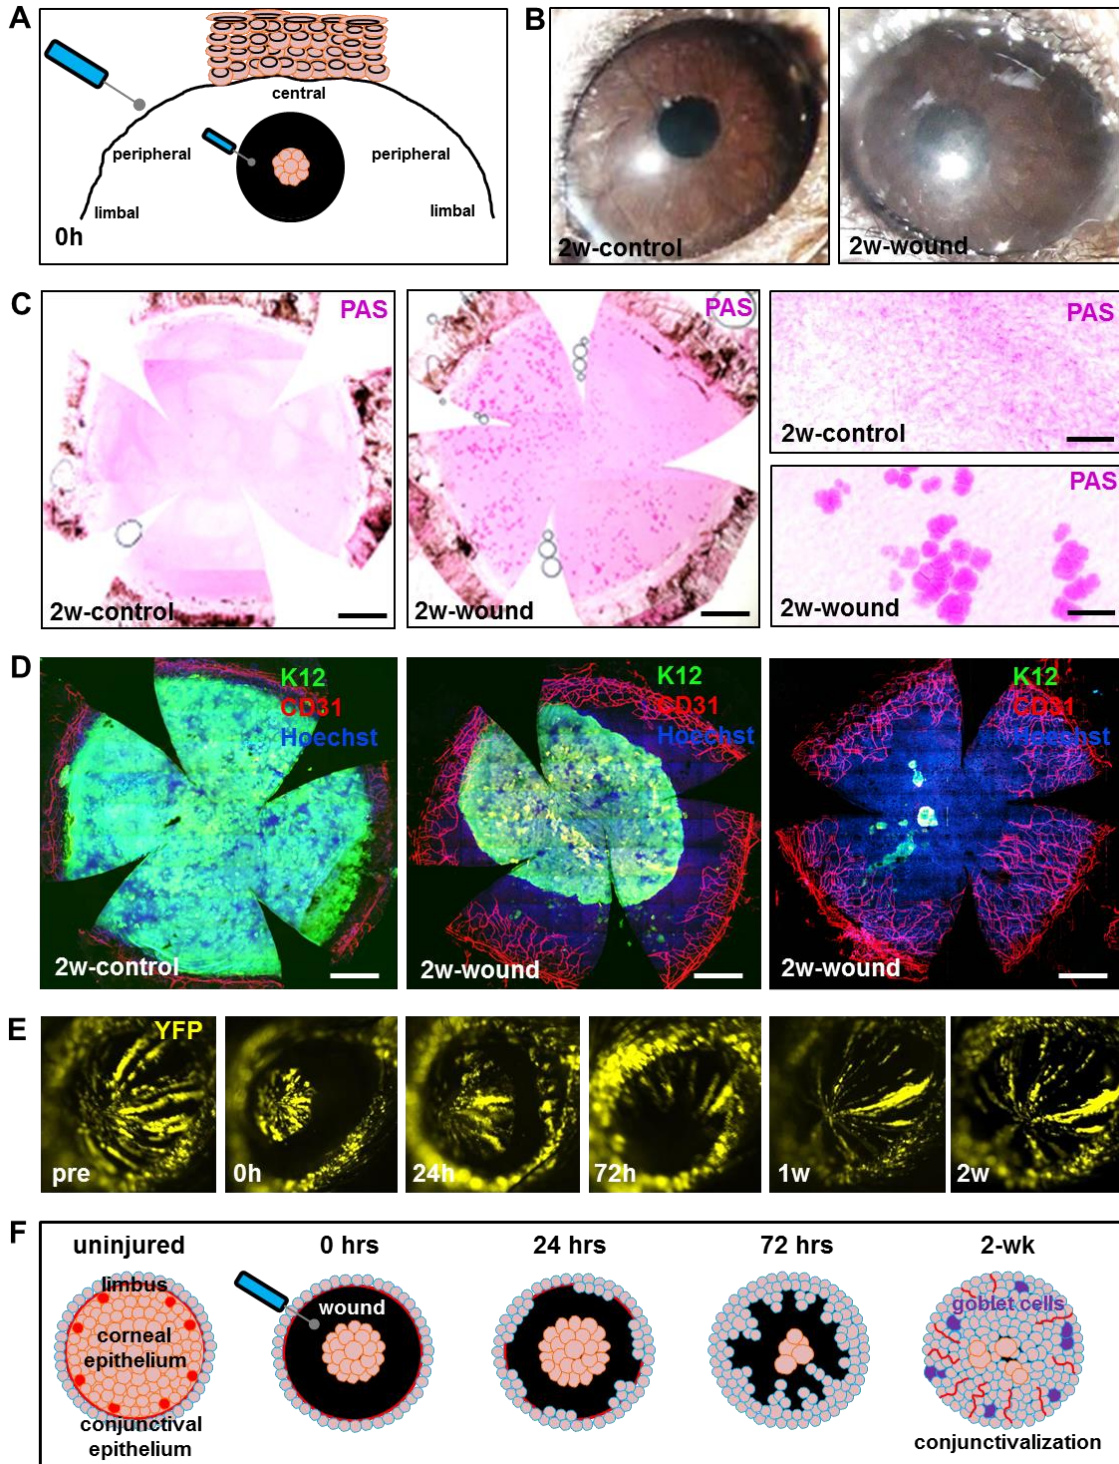

## Supplementary Figure Title and Legend

### ***SI Appendix, Fig. S1. Development of limbal stem cell deficiency-like clinicopathological features upon inflicting an annular limbal debridement injury.***

(A) Schematic representation of how an annular limbal epithelial (type III) wound was inflicted.

(B) WT mice ( $n=3/group$ ) had their right corneal epithelium mechanically debrided to inflict a type III annular limbal defect. Representative slit-lamp images of unwounded (left panel) and wounded (right panel) corneas are displayed.

(C) Resected corneas from unwounded and wounded mice were stained with PAS and flat-mounted for goblet cell content. Scale bars 500  $\mu\text{m}$  (whole corneas, first and second panel) and 100  $\mu\text{m}$  (magnified images, third column).

(D) Corneas were double-immunostained for K12 (green) and CD31 (red) and imaged by scanning fluorescence confocal microscopy. Scale bars 500  $\mu\text{m}$ .

(E) Intravital microscopy was performed on a Confetti mouse that had endured a type III annular wound. For ease of visualization, only YFP<sup>+</sup> (yellow) luminescing cells were monitored during the 2-week chase period.

(F) Schematic depiction on how an annular limbal epithelial debridement wound develops conjunctivalization over a 2-week time course. Conjunctival epithelia (blue), limbal epithelial stem cells (red), corneal epithelia (orange), goblet cells (purple), blood vessels (red wavy lines)

## **Supplementary Materials and Methods**

### ***Slit-lamp biomicroscopy, Immunofluorescence and PAS staining***

Mice were anesthetized by an IP injection of 100 µg/g ketamine (Provet) and 10 µg/g xylazine (Sigma-Aldrich), and some eyes were imaged at 2-week post-wounding by slit-lamp microscopy (Nikon FS-3). Images were processed using ImageJ software (NIH).

After slit-lamp imaging, mice were euthanized, eyes were enucleated and fixed in 2% paraformaldehyde for 1 hr at RT, and placed in PBS. Corneas were extracted, extraneous tissues (lens, iris, retina and ocular muscles) removed and equilibrated in Tris-buffered saline (TBS, pH 7.6) containing 2% bovine serum albumin and 0.1% Triton X-100 (TBS-BT) (Life Technologies), and then blocked in TBS-BT for 6 hrs at RT. Next, the corneas were sequentially incubated overnight at 4°C with rabbit anti-CD31 antibody (Ab) (2 µg/ml; ab28364, Abcam), and then with goat anti-K12 Ab (2 µg/ml; sc-17101, Santa Cruz) for 2 days in TBS-BT. Corneas were flooded with TBS-BT to remove unbound Abs, reacted with Alexa-Fluor<sup>488</sup>-conjugated Donkey anti-goat and Alexa-Fluor<sup>647</sup>-conjugated chicken anti-rabbit (Life Technologies) in TBS-BT at a final concentration of 5 µg/ml for 2 days at 4°C, then counter-stained with Hoechst 33342 (1 µg/ml; Life Technologies). Corneas were placed epithelium side-down on glass slides, mounted in ProLong Gold<sup>®</sup> anti-fade reagent containing DAPI (Life Technologies), weighted overnight to facilitate flattening, and imaged using a Zeiss 780 confocal microscope (Carl Zeiss).

The same corneas were stained with PAS, and observed under a BX51 light microscope (Olympus), imaged on a digital camera (DP73; Olympus) and processed using CellSens® (Olympus).

### **Supplementary Movie Titles**

***SI Appendix, Movie S1: Migration of K14<sup>+</sup> limbal progenitor-derived clones in annular wounds, related to [Fig. 2](#).***

***SI Appendix, Movie S2: Vector flow-maps of the migratory path taken by K14<sup>+</sup> limbal progenitor-derived clones in annular wounds, related to [Fig. 2](#).***

***SI Appendix, Movie S3: Simulation of an annular wounded cornea, related to [Fig. 6](#) and [Table 1](#).***
